# Supplementary material for: Effect of natural organic matter on the disagglomeration of manufactured TiO2 nanoparticles
Source: Royal Society of Chemistry journal article supplement (doi:10.1039/c3en00061c), 2014-01-01
Supplement: c3en00061c.pdf [file c3en00061c.pdf]

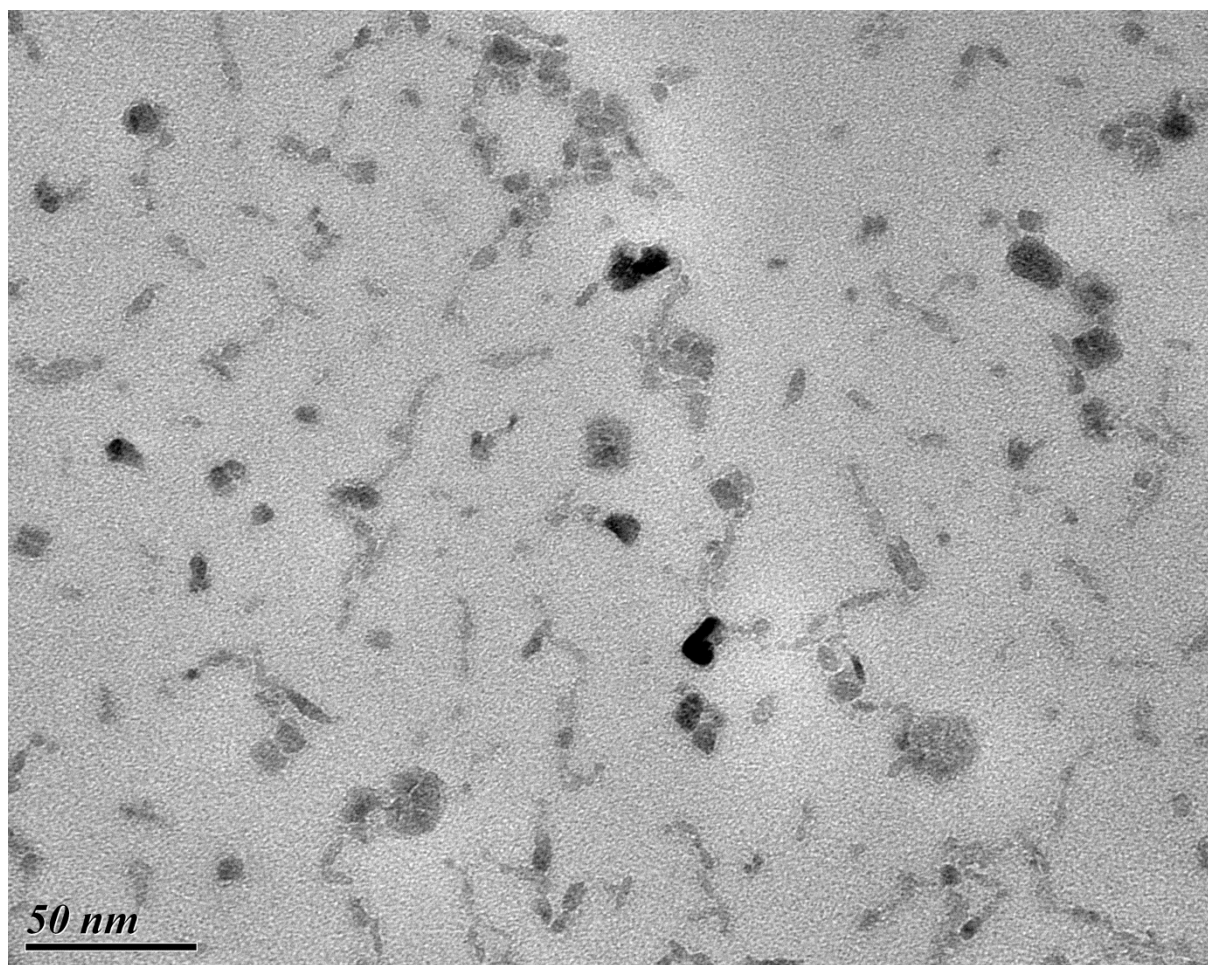

S1 - Transmission Electron Microscopy image of dispersed TiO<sub>2</sub> NPs at pH 4.5 and 500,000× magnification. Isolated and small aggregates are observed. [TiO<sub>2</sub>] = 100 mg/L.

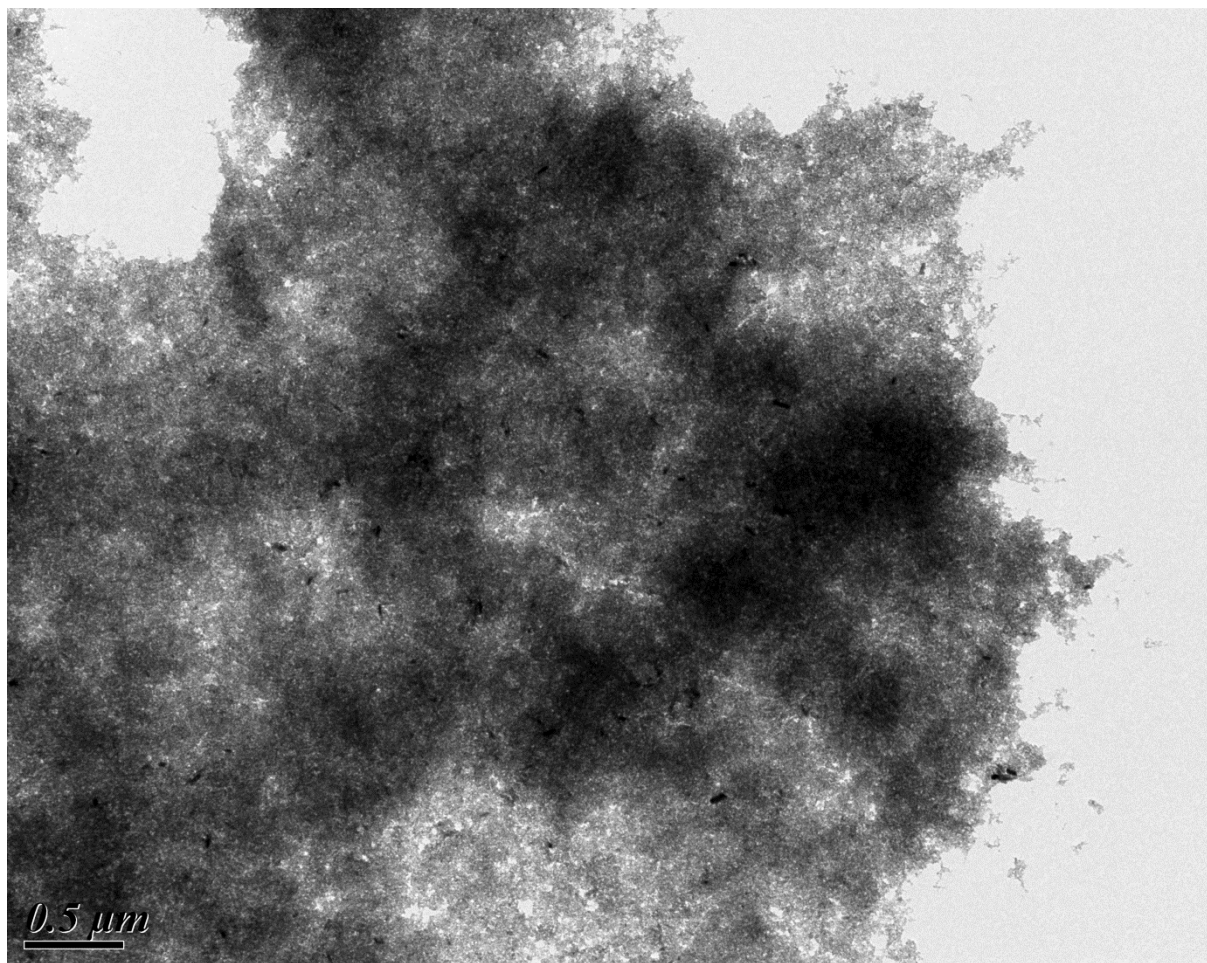

S2 - TEM image of  $\text{TiO}_2$  aggregates at  $\text{pH} = 6.2 = \text{pH}_{\text{PZC}, \text{TiO}_2}$  and  $30,000\times$  magnification.

Large agglomerates are observed.  $[\text{TiO}_2] = 100 \text{ mg/L}$ .



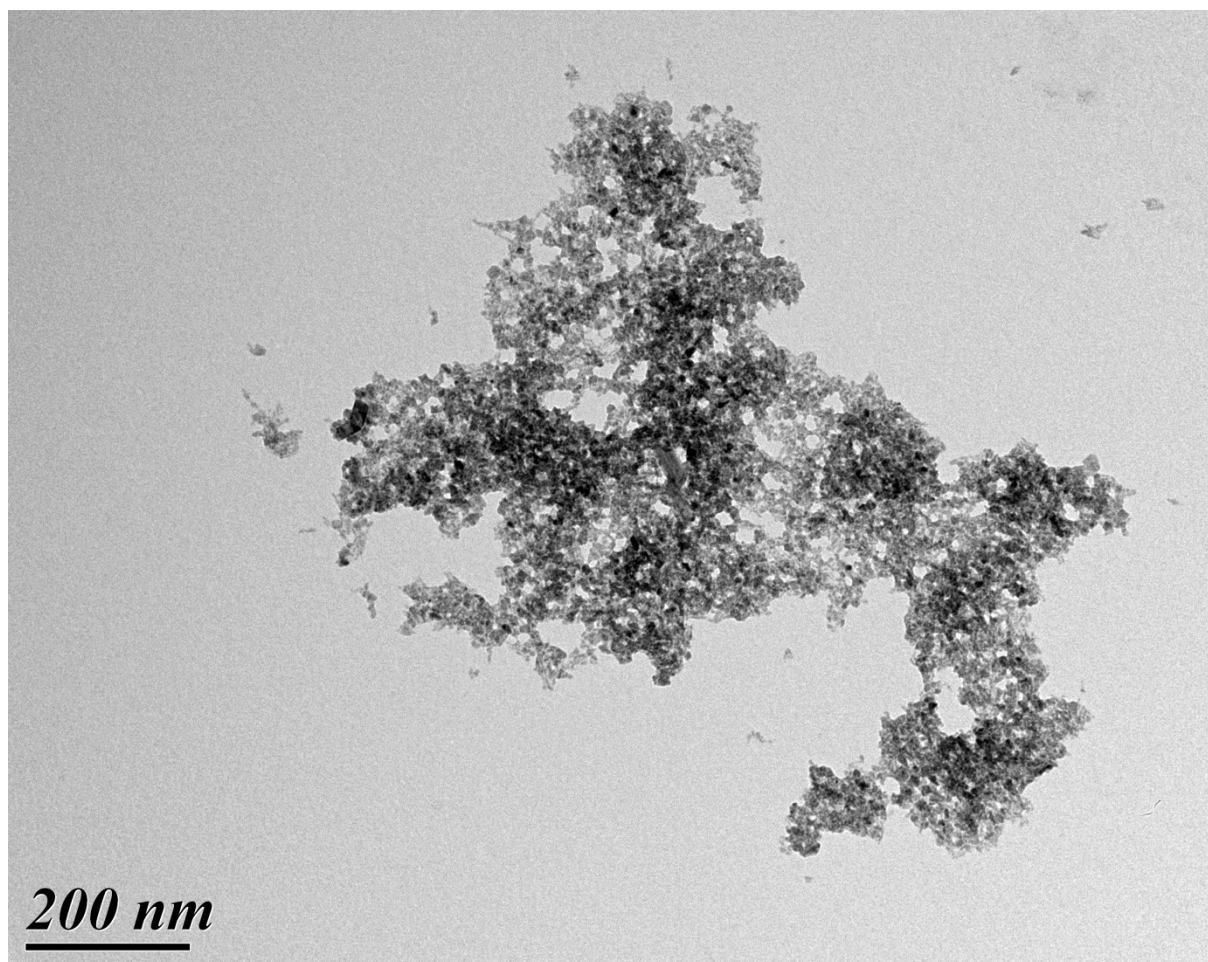

S3 - TEM image of  $\text{TiO}_2$  NPs aggregate fragments at pH 6.2 in the presence of alginate at 120,000 $\times$  magnification. The presence of alginate resulted in the fragmentation of agglomerates.  $[\text{TiO}_2] = 100 \text{ mg/L}$ ;  $[\text{Alginate}] = 6 \text{ mg/L}$ .

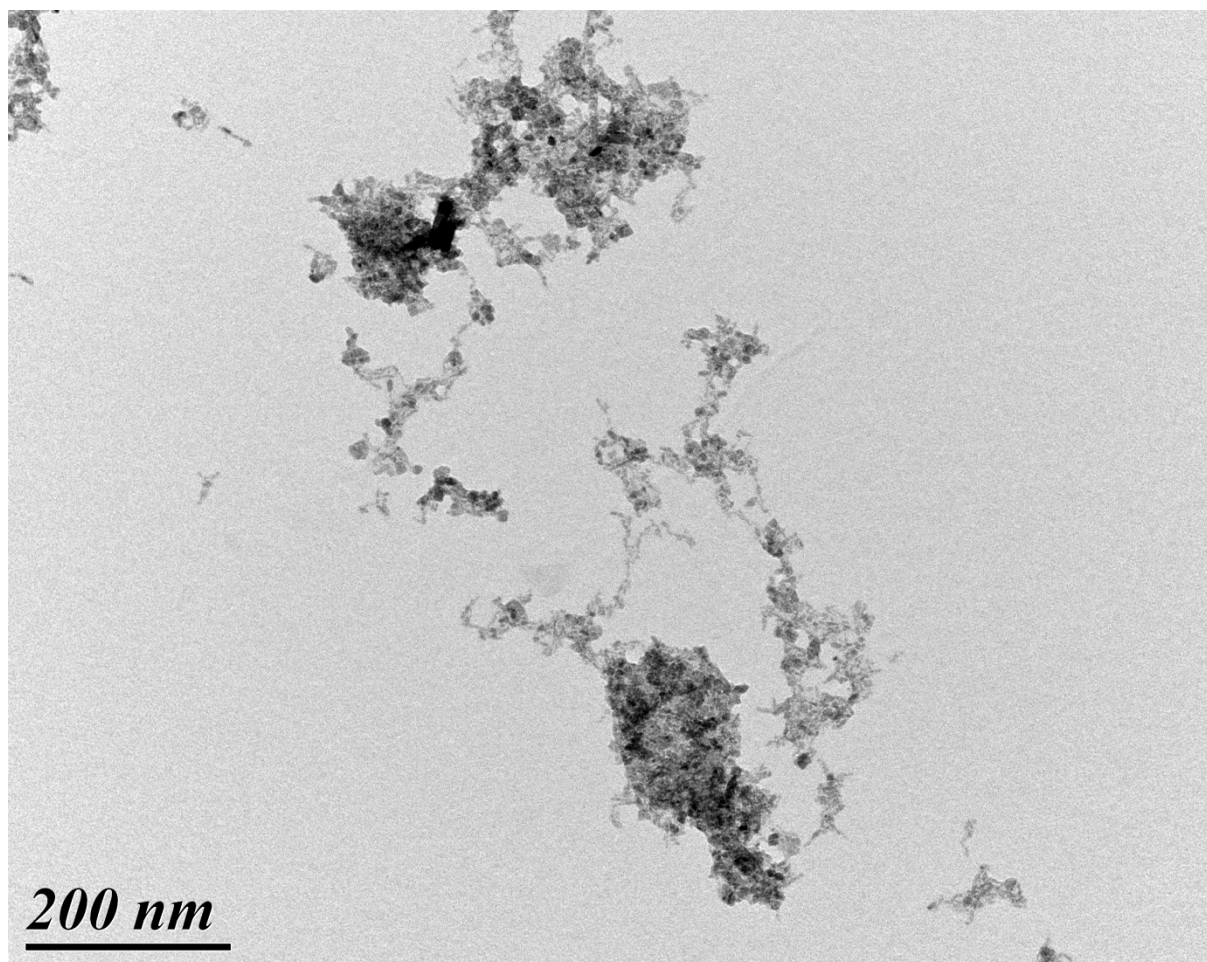

S4 - TEM image of  $\text{TiO}_2$  NPs aggregate fragments at  $\text{pH} = 6.2$  in the presence of SRHA at  $100,000\times$  magnification. The presence of SRHA lead to the fragmentation of agglomerates.  $[\text{TiO}_2] = 100 \text{ mg/L}$ ;  $[\text{SRHA}] = 10 \text{ mg/L}$ .
